# Supplementary material
Source: PubMed Central journal article supplement (PMC4512190)
Supplement: supp_mcv078_aob-14968-s05.pdf [file supp_mcv078_aob-14968-s05.pdf]

## SUPPLEMENTARY DATA

Fig. S1. Spectral reflectance of the petal upper surface (left) and petal lower surface (right) of *Silene niceensis* and *S. ramosissima*.

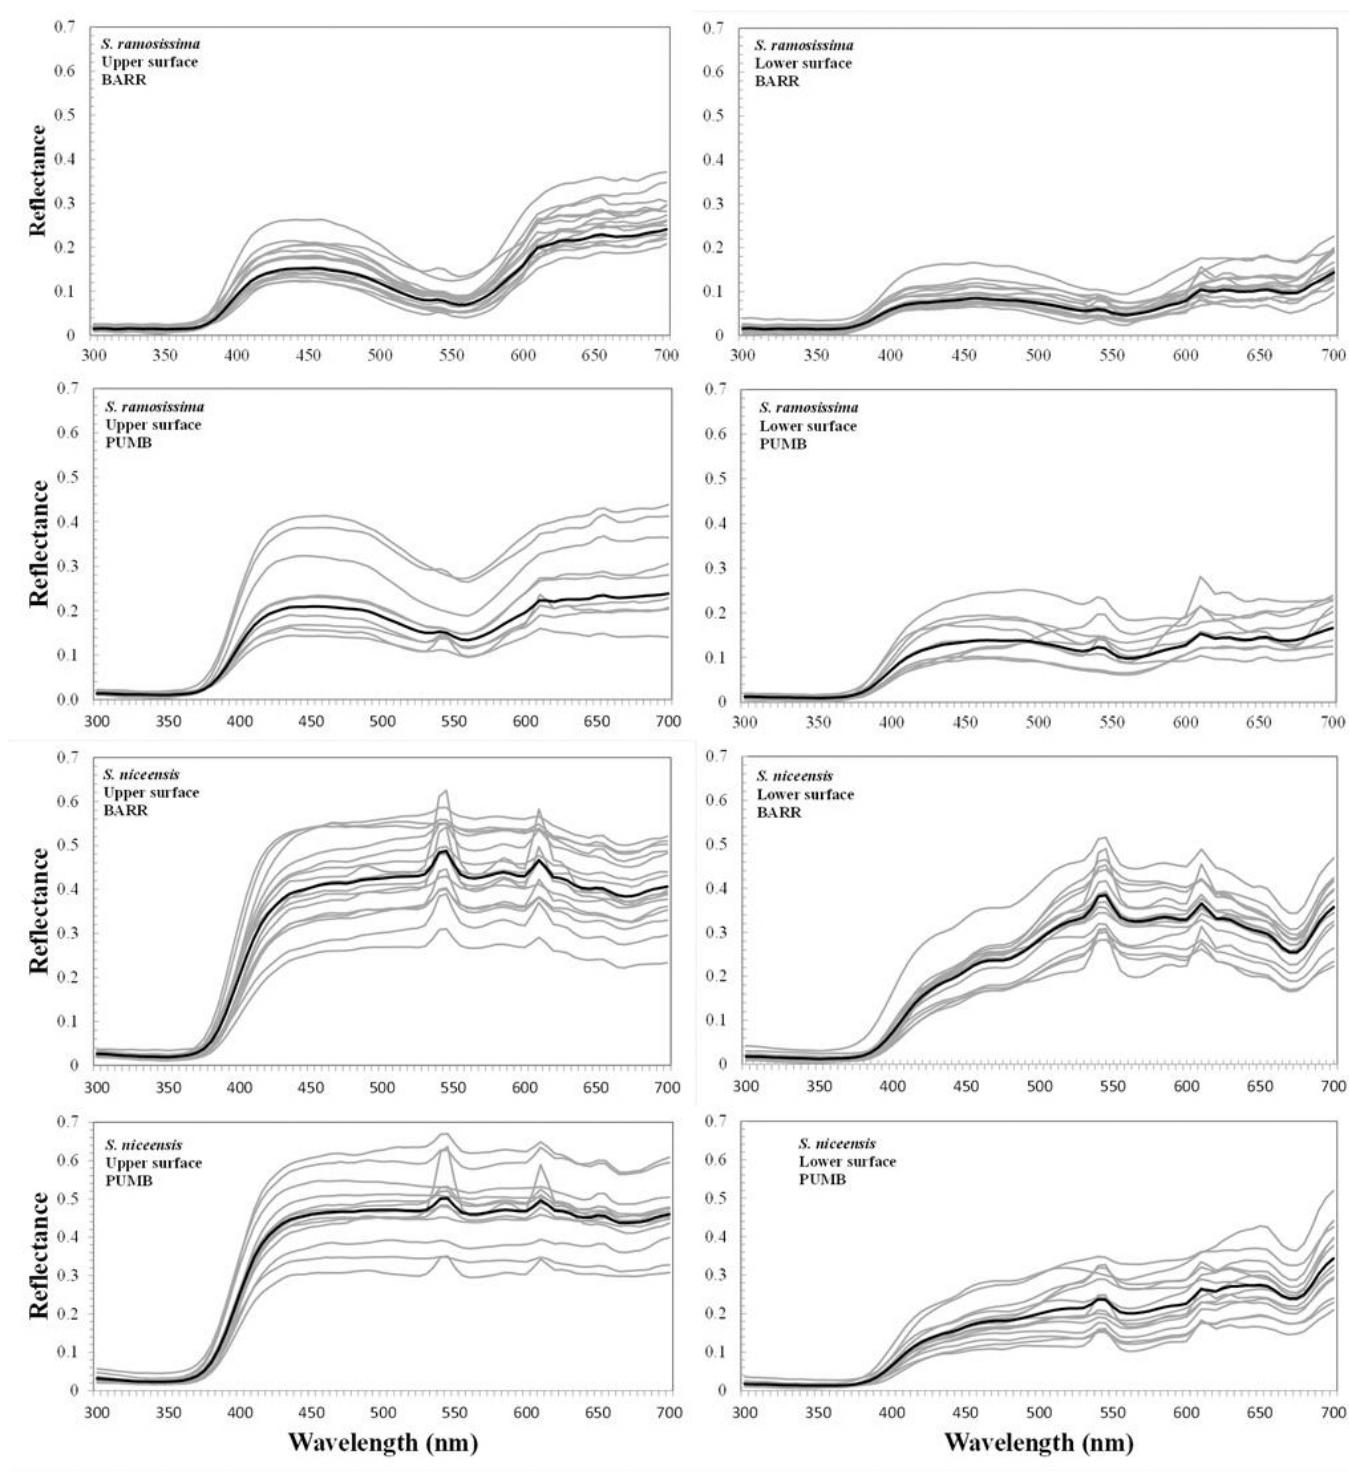

**Video S1:** short film showing a visit by *Hyles* spp. (Sphingidae) to the flowers of *S. niceensis*.

**Video S2:** short film showing a visit by Noctuidae to the flowers of *S. niceensis*. **Video S3:** short film showing a visit by Noctuidae to the flowers of *S. ramosissima*. **Video S4:** short film showing a visit by Syrphidae to both *S. ramosissima* and *S. niceensis* flowers.
